# Supplementary material
Source: PubMed Central journal article supplement (PMC4551240)
Supplement: AEM.00945-15_zam999116504so1.pdf [file AEM.00945-15_zam999116504so1.pdf]

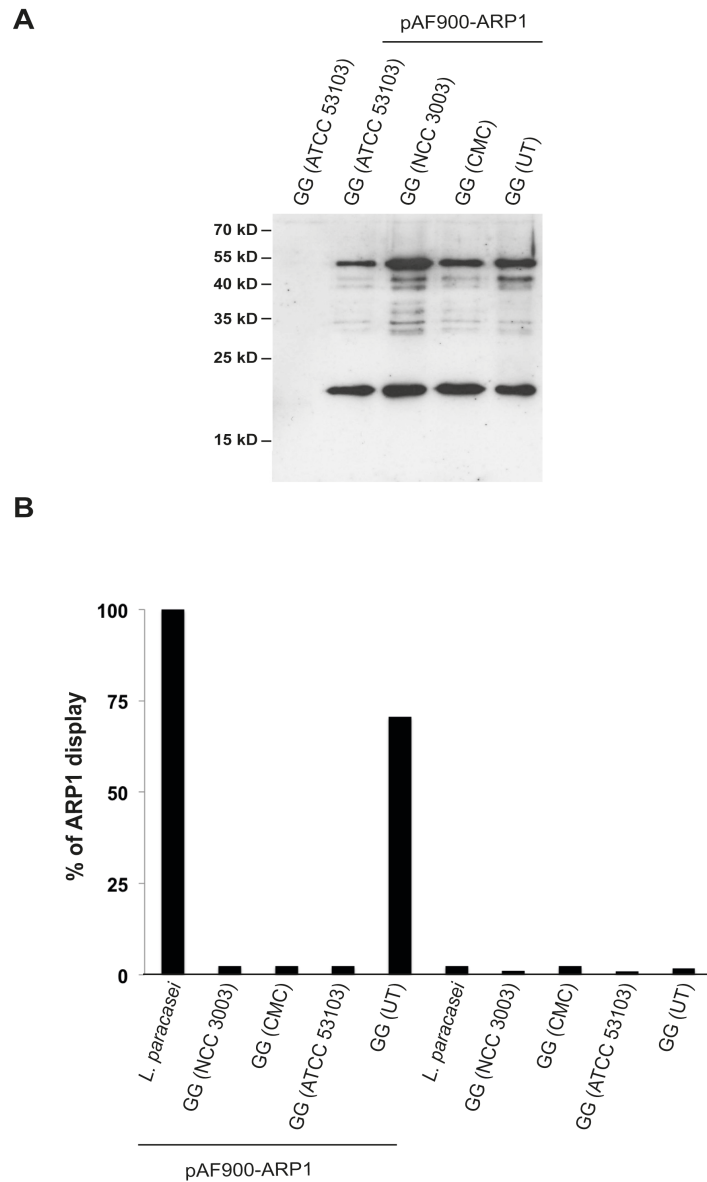

**Fig S1.** Production and display of ARP1 in the different GG strains with the plasmid pAF900-ARP1. (A) Production of ARP1 determined in culture cell extracts by Western blot using monoclonal mouse anti-E-tag antibodies and HRP labelled goat anti-mouse antibodies as primary and secondary antibodies, respectively. The signal was detected by chemiluminescence using the ECL Plus<sup>TM</sup> Western blotting detection system (GE Healthcare). The theoretical molecular weight of the recombinant ARP1-PrtP protein is 39.7 kDa. (B) Display of ARP1 on the surface of the cells determined with a fluid based assay. The results are represented as percentage of display taking the display of ARP1 on the surface of *L. paracasei* pAF900-ARP1 as 100 %. Non-transformed Lactobacilli strains were used as negative controls.

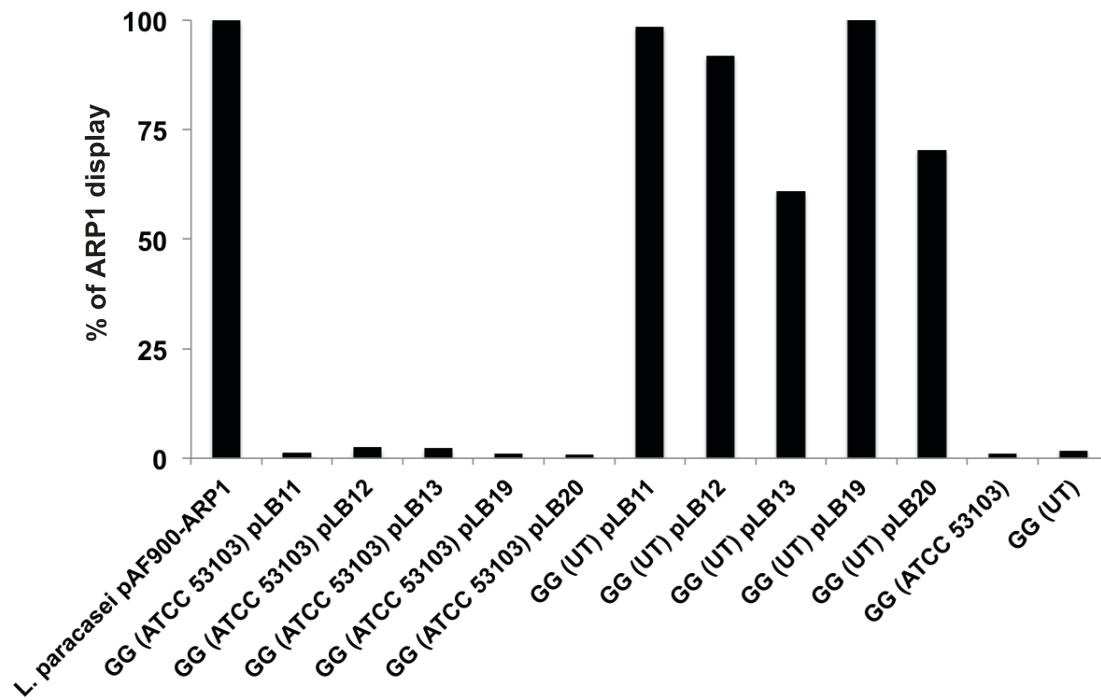

**Fig S2.** Display of ARP1 on the surface of the cells of the strains GG (ATCC 53103) and GG (UT) transformed with different constructs to produce ARP1 with different anchor domain lengths. The display was determined with a fluid based assay. The results are represented as percentage of display taking the display of ARP1 on the surface of *L. paracasei* pAF900-ARP1 as 100 %. Non-transformed GG strains were used as negative controls.

**Table S1.** Primers used for cloning purposes. The restriction sites added to the sequence are underlined.

| Primer           | Sequence (5'-3')                                          | Purpose; relevant features                                                                  |
|------------------|-----------------------------------------------------------|---------------------------------------------------------------------------------------------|
| PrtPGG_450_Fw    | CGCAGCTAGCAAGGCGGCAGCAGGTGAGACC                           | Cloning of 450 aa anchor domain; <i>NheI</i> site                                           |
| PrtPGG_500_Fw    | CGCAGCTAGCAAGAACGTCTTAACCGTTGCGGC                         | Cloning of 500 aa anchor domain; <i>NheI</i> site                                           |
| PrtPGG_550_Fw    | CGCAGCTAGCCGTATCACCGAACAGCGACAG                           | Cloning of 550 aa anchor domain; <i>NheI</i> site                                           |
| PrtPGG865etag_F  | AAGCGCGGCCGCAGGTGCGCCGGTGCCGTATCCGGATCCG                  | Cloning of 865 aa anchor domain; <i>NotI</i> site, E-tag-coding sequence, <i>NheI</i> site  |
|                  | CTGGAACCGCGTGCCGCAGCTAGCGCTTATGATCTGATTAT<br>TAATGGTGGTGG |                                                                                             |
| PrtPGG1275etag_F | AAGCGCGGCCGCAGGTGCGCCGGTGCCGTATCCGGATCCG                  | Cloning of 1275 aa anchor domain; <i>NotI</i> site, E-tag-coding sequence, <i>NheI</i> site |
|                  | CTGGAACCGCGTGCCGCAGCTAGCTTGGAGAAGAATCCAT<br>CAACGGTTG     |                                                                                             |
| PrtPGG_Rv        | GTTGAGAGCTCTTAGCTTTGCTTGCCTTACGCTT                        | Cloning of anchor domains; <i>SacI</i> site                                                 |
| RmlA2_Eco_F      | GCTCGAATTCGCCAACATCATGGTTGACAG                            | Cloning of <i>welF-welE</i> into pIAV7; <i>EcoRI</i> site                                   |
| WelG_Sal_R       | GCTCGTCGACGTGGGGTTTCGGGAGATTAT                            | Cloning of <i>welF-welE</i> into pIAV7; <i>SalI</i> site                                    |

**Table S2.** Oligonucleotides used for quantification of expression by qPCR

| Gene/region | Primer       | Sequence (5' to 3')   | Amplicon length in bp |
|-------------|--------------|-----------------------|-----------------------|
| LGG_00053   | LGG_00053-Fw | AATTTGCGCCCAGCACTATG  | 84                    |
|             | LGG_00053-Rv | CAGCACGATCGATGCACTTT  |                       |
| LGG_00208   | LGG_00208-Fw | CGATTCTACCAGGCAGTTGAT | 105                   |
|             | LGG_00208-Rv | GCGGAATACCGCTACATTCT  |                       |
| LGG_00234   | LGG_00234-Fw | GGGTGTTTGTCCAAGCGTT   | 114                   |
|             | LGG_00234-Rv | CCACAATCAATGAGACCGCC  |                       |
| LGG_01436   | LGG_01436-Fw | CACCGAGGTCATTGTTGCAG  | 119                   |
|             | LGG_01436-Rv | TCTGATCAAGGGAGATGCCG  |                       |
| LGG_01443   | LGG_01443-Fw | TTTGTCACAAGCAGAGCACG  | 118                   |
|             | LGG_01443-Rv | CTTACGCGGCAAACCTTAGCA |                       |
| LGG_01444   | LGG_01444-Fw | AGAACAAGGCCATCAGCAGT  | 88                    |
|             | LGG_01444-Rv | CGGATCAAAGTCGGGTGTTG  |                       |
| LGG_01445   | LGG_01445-Fw | ACTCATTGCGCCATTACGTG  | 106                   |
|             | LGG_01445-Rv | CAACAGTTGGGCAAGCTGAG  |                       |
| LGG_01446   | LGG_01446-Fw | CGACTTACCCGAGTACCAG   | 89                    |
|             | LGG_01446-Rv | ATCAATCAAACCGGTTGCGG  |                       |
| LGG_01501   | LGG_01501-Fw | AATCATTGCCTGGCTGCTTG  | 101                   |
|             | LGG_01501-Rv | GATTGCCATCTGCCATTC    |                       |

|              |                 |                         |     |
|--------------|-----------------|-------------------------|-----|
| LGG_01502    | LGG_01502-Fw    | CAAACGGTGGATTACGCCTC    | 105 |
|              | LGG_01502-Rv    | CCCGATGAACCTTATTGGCG    |     |
| LGG_01503    | LGG_01503-Fw    | CTGTGGTCCTTACACGCAGA    | 111 |
|              | LGG_01503-Rv    | ATGTGATGAGCGGAGTTGGT    |     |
| LGG_01504    | LGG_01504-Fw    | TGGCTATGTCAGTGCAGGAT    | 109 |
|              | LGG_01504-Rv    | CACTGGCACTAATGGTTGGC    |     |
| WeIE         | WeIE-Fw         | CCCGGTCATTGAAGACGAGT    | 100 |
|              | WeIE-Rv         | TCGACCACTAGCTTGCCATT    |     |
| Upstr_WelF   | Upstr_WelF-Fw   | CGCGAGAGTTATTTCTAAAGGCT | 112 |
|              | Upstr_WelF-Rv   | GTGGTCGCATTGGAAAGGT     |     |
| Downstr_WelF | Downstr_WelF-Fw | GCTGCAGTGCATATTCTGCC    | 90  |
|              | Downstr_WelF-Rv | TGATGTAACAACAGGAATTTGCA |     |

---

**Table S3.** Genomic differences among the strains GG (ATCC 53103), GG (Gefilus®) and GG (UT) in comparison to the reference sequence (accession no. FM179322).

| Position of the ref. sequence | Genomic variations |               |            | Description                                                                                                                                                                                                                     |
|-------------------------------|--------------------|---------------|------------|---------------------------------------------------------------------------------------------------------------------------------------------------------------------------------------------------------------------------------|
|                               | GG (ATCC 53103)    | GG (Gefilus®) | GG (UT)    |                                                                                                                                                                                                                                 |
| 57657                         | Ref. <sup>a</sup>  | Ref.          | ins 1585bp | Locus tag LGG_00053 (gene <i>kdgK</i> ; product: 2-dehydro-3-deoxygluconokinase). Insertion.                                                                                                                                    |
| 240673                        | del 871bp          | Ref.          | Ref.       | Locus tag LGG_00234 (product: hypothetical protein). Partial deletion.<br>Loci tag LGG_00235 (gene <i>is7</i> ; product: transposase <i>is7</i> ) and LGG_00236 (gene <i>is8</i> ; product: transposases <i>is8</i> ). Deletion |
| 264278                        | SNP G >A           | Ref.          | Ref.       | Locus tag LGG_000261 (gene <i>iolt</i> ; product : transporter major facilitator superfamily MFS_1). Amino acid change A420T.                                                                                                   |
| 656561                        | ins CGC            | Ref.          | Ref.       | Locus tag LGG_00643 (gene <i>glpD</i> ; product: alpha-glycerophosphate oxidase). Codon insertion G163-164ins.                                                                                                                  |
| 1241467                       | SNP A->G           | Ref.          | Ref.       | Locus tag LGG_01248 (gene <i>is39</i> ; product: transposase, IS5 family                                                                                                                                                        |

|         |          |      |            |                                                                                                                                         |
|---------|----------|------|------------|-----------------------------------------------------------------------------------------------------------------------------------------|
|         |          |      |            | protein). Amino acid change: C250R.                                                                                                     |
| 1994717 | SNP T->A | Ref. | Ref.       | Locus tag LGG_01953 (product: conserved protein). Amino acid change D903V.                                                              |
| 2095506 | Ref.     | Ref. | SNP A->T   | Locus tag LGG_02043 (gene <i>welE</i> ; product: UDP-phosphate beta-glucosephosphotransferase). Amino acid change to stop codon: L177*. |
| 2096942 | Ref.     | Ref. | ins 855 bp | Locus tag LGG_02044 (gene <i>welF</i> ; product: glycosyl transferase, group 1). Insertion of is with two transposases.                 |

<sup>a</sup> Ref., no difference with the reference sequence (accession no. FM179322).

**Table S4.** Genes with differential expression among *L. rhamnosus* GG strains as measured by microarray-based transcriptome analysis

| GG (ATCC 53103) vs GG (Gefilus®)                         |                                                          | GG (ATCC 53103) vs GG (UT)                                                |                                                                        | GG (Gefilus®) vs GG (UT)                                               |                                                                        | Possible loci <sup>3</sup>                                    | Gene product /description                                                                                  |
|----------------------------------------------------------|----------------------------------------------------------|---------------------------------------------------------------------------|------------------------------------------------------------------------|------------------------------------------------------------------------|------------------------------------------------------------------------|---------------------------------------------------------------|------------------------------------------------------------------------------------------------------------|
| Fold change <sup>1</sup>                                 | p-value <sup>2</sup>                                     | Fold change                                                               | p-value                                                                | Fold change                                                            | p-value                                                                |                                                               |                                                                                                            |
| -1,30256379<br>-1,11498229<br>-1,12777148<br>-1,13955693 | 0,457472405<br>0,377996719<br>0,571051806<br>0,585961233 | 1,022262301<br><b>-4,886399172</b><br><b>-4,37344236</b><br>-1,386667327  | 0,959257016<br><b>0,000240499</b><br><b>0,004681272</b><br>0,319650398 | 1,331561858<br><b>-4,38249039</b><br><b>-3,87795083</b><br>-1,21684778 | 0,323859406<br><b>0,000276856</b><br><b>0,005865375</b><br>0,5173084   | LGG_00152<br>LGG_00460<br>LGG_00461<br>LGG_01024<br>LGG_00457 | Transposase                                                                                                |
| -1,12923092<br>-1,11599493                               | 0,54191247<br>0,617717466                                | <b>-4,456677539</b><br>-1,374981157                                       | <b>0,003303284</b><br>0,315391192                                      | <b>-3,94664853</b><br>-1,23206757                                      | <b>0,004136994</b><br>0,516997919                                      | LGG_00153<br>LGG_00461<br>LGG_01023<br>LGG_01584<br>LGG_00457 | Transposase                                                                                                |
| -1,00853061<br>-1,01677769                               | 0,968939415<br>0,941849182                               | 1,44391591<br><b>-4,365380843</b>                                         | 0,149247972<br><b>0,000357749</b>                                      | 1,456233396<br><b>-4,29334837</b>                                      | 0,165106398<br><b>0,000364026</b>                                      | Intergenic region<br>(LGG_01506 / LGG_01507)                  | 13 bp at 5' side: 4-oxalocrotonate tautomerase and 400 bp at 3' side: ABC transporter, ATP-binding protein |
| -1,15191474<br>-1,20258081<br>-1,07725479<br>-1,13755898 | 0,476022183<br>0,46625983<br>0,740578086<br>0,366087732  | -1,506199918<br><b>-4,632497086</b><br>1,204187583<br><b>-5,015400418</b> | 0,194362167<br><b>0,001895731</b><br>0,546424233<br><b>0,000154675</b> | -1,30756198<br><b>-3,85212957</b><br>1,297216842<br><b>-4,4089146</b>  | 0,37094104<br><b>0,002521001</b><br>0,332487072<br><b>0,000184028</b>  | LGG_00152<br>LGG_00457<br>LGG_00461<br>LGG_01024<br>LGG_01584 | Transposase                                                                                                |
| -1,22428938<br>-1,18727539<br>-1,06330431<br>-1,16670804 | 0,440729323<br>0,497295235<br>0,64992799<br>0,009258703  | -1,474009991<br><b>-4,308960307</b><br>1,037402897<br><b>-5,242316734</b> | 0,315765619<br><b>0,002564362</b><br>0,877305132<br><b>1,05677E-05</b> | -1,20397188<br><b>-3,62928461</b><br>1,103074974<br><b>-4,49325502</b> | 0,596910764<br><b>0,003359434</b><br>0,669544017<br><b>1,31552E-05</b> | LGG_00152<br>LGG_01584<br>LGG_00461<br>LGG_01024<br>LGG_00457 | Transposase                                                                                                |
| -1,1947184<br>1,064313564<br>-1,04651865                 | 0,623943702<br>0,129093692<br>0,664248404                | <b>-3,589619186</b><br><b>-4,362402503</b><br>-1,139739043                | <b>0,027529411</b><br><b>4,35561E-06</b><br>0,601724761                | <b>-3,00457345</b><br><b>-4,64296416</b><br>-1,08907667                | <b>0,036681336</b><br><b>3,92639E-06</b><br>0,717470046                | LGG_00153<br>LGG_00461<br>LGG_01025                           | Transposase , IS4 family protein                                                                           |



|                                                                                                |                                                                                               |                                                                                                                  |                                                                                                      |                                                                                                                  |                                                                                                             |                                                  |                                   |
|------------------------------------------------------------------------------------------------|-----------------------------------------------------------------------------------------------|------------------------------------------------------------------------------------------------------------------|------------------------------------------------------------------------------------------------------|------------------------------------------------------------------------------------------------------------------|-------------------------------------------------------------------------------------------------------------|--------------------------------------------------|-----------------------------------|
| -1,04168016<br>-1,08087368<br>1,030173979                                                      | 0,712872243<br>0,510879754<br>0,92868417                                                      | <b>-3,590533136</b><br>-1,011144187<br>-1,396312841                                                              | <b>0,000505078</b><br>0,977787098<br>0,57043429                                                      | <b>-3,44686715</b><br>1,06896098<br>-1,43844516                                                                  | <b>0,000534201</b><br>0,860940319<br>0,530564403                                                            | LGG_00458                                        |                                   |
| <b>-4,38551179</b><br>2,126296256<br><b>-3,541204615</b><br><b>-4,505082369</b><br>1,916282234 | <b>1,25369E-05</b><br>0,249641023<br><b>0,000114368</b><br><b>8,33901E-06</b><br>0,001712897  | <b>-4,180905506</b><br>4,441071718<br><b>-4,178881487</b><br><b>-5,312359691</b><br>2,058539254                  | <b>5,96911E-05</b><br>0,094432438<br><b>8,89039E-06</b><br><b>6,44213E-08</b><br>0,001350889         | 1,04893827<br>2,088642025<br>-1,180073433<br>-1,179192578<br>1,074235944                                         | 0,621807295<br>0,164177562<br>0,11431372<br>0,025401288<br>0,695958244                                      | LGG_00236<br>LGG_00581<br>LGG_02160<br>LGG_02165 | Transposase                       |
| <b>-3,786489339</b><br>1,455417423<br>-2,414765335<br>1,806945298                              | <b>0,00992647</b><br>0,063550548<br>1,78375E-05<br>0,100363228                                | -2,937455427<br>1,366516927<br>-2,55181984<br>1,884783312                                                        | 0,009434152<br>0,103220222<br>0,000724284<br>0,080820138                                             | 1,289037207<br>-1,065056271<br>-1,056756863<br>1,043077128                                                       | 0,35446701<br>0,705959443<br>0,610759693<br>0,901539369                                                     | LGG_00236<br>LGG_00581<br>LGG_02160<br>LGG_02166 | Transposase, IS4 family protein   |
| 1,053742604<br>1,050333452<br>1,014611503<br>-1,1411888<br>-1,00512619                         | 0,761128215<br>0,503537783<br>0,974490235<br>0,689181282<br>0,989782576                       | 2,301365176<br><b>3,717647226</b><br>-1,245784275<br>-1,410842645<br>-1,374618576                                | 0,005223161<br><b>6,15658E-06</b><br>0,51073417<br>0,20619192<br>0,334137179                         | 2,18399177<br><b>3,539492357</b><br>-1,26398706<br>-1,23629205<br>-1,33092662                                    | 0,005958459<br><b>9,91573E-06</b><br>0,470984151<br>0,428387985<br>0,334237605                              | LGG_00053*                                       | 2-dehydro-3-deoxygluconokinase    |
| -2,6237764<br>-2,37705506<br>-2,62132016<br>-2,30642079<br>-2,57139599<br>-2,63442065          | 0,020857579<br>0,085096044<br>0,006948493<br>0,002415726<br>0,029904663<br>0,000266002        | -2,818210553<br>-2,10710234<br>-2,889171548<br>-2,972176756<br>-2,9996609<br><b>-3,283704759</b>                 | 0,01230683<br>0,128624588<br>0,006252509<br>0,002542378<br>0,016370001<br><b>4,1804E-05</b>          | -1,0741047<br>1,12811562<br>-1,10218187<br>-1,2886533<br>-1,16654957<br>-1,24646182                              | 0,788196361<br>0,754059386<br>0,653186535<br>0,168182339<br>0,605850816<br>0,067604243                      | LGG_00208*                                       | Conserved hypothetical protein    |
| 1,5145655<br>-1,216785328<br>1,32612977<br>-1,331768017<br><b>-13,90558608</b><br>1,307881557  | 0,001249791<br>0,548591046<br>0,292774794<br>0,703134188<br><b>1,74343E-07</b><br>0,210917451 | 1,343293939<br>-1,160915285<br>1,38665235<br>-1,185303538<br><b>-15,48328312</b><br>1,416821138                  | 0,01693384<br>0,609953063<br>0,255333229<br>0,818439988<br><b>6,75035E-06</b><br>0,168132402         | -1,127501179<br>1,048125857<br>1,045638505<br>1,123567065<br>-1,113457788<br>1,083294684                         | 0,266157576<br>0,842382904<br>0,722009226<br>0,869012594<br>0,20390891<br>0,813530316                       | LGG_00234*                                       | Putative protein without homology |
| -1,182930563<br>-1,023834232<br>-1,057595816<br>1,00300609<br>-1,011269562<br>-1,170826612     | 0,642833674<br>0,839265045<br>0,784199823<br>0,985193006<br>0,883307379<br>0,520688958        | <b>-3,590353892</b><br>-1,156739651<br><b>-3,756996305</b><br>2,139826384<br><b>-3,709753524</b><br>-1,656340722 | 0,038174421<br>0,568032451<br><b>0,001273333</b><br>0,007406187<br><b>0,000596917</b><br>0,408761724 | <b>-3,035134947</b><br>-1,129811462<br><b>-3,552393313</b><br>2,133413153<br><b>-3,668412127</b><br>-1,414676353 | 0,049791598<br>0,623070854<br><b>0,001091365</b><br><b>0,008119082</b><br><b>0,000626199</b><br>0,551613584 | LGG_00458                                        | Transposase, IS4 family protein   |
| -1,166267101                                                                                   | 0,709080442                                                                                   | <b>-3,271309728</b>                                                                                              | 0,028891283                                                                                          | -2,804940417                                                                                                     | 0,039740542                                                                                                 | LGG_00460                                        | Transposase , IS4 family          |

|                                                                                                           |                                                                                                     |                                                                                                              |                                                                                                     |                                                                                            |                                                                                        |            |                                                       |
|-----------------------------------------------------------------------------------------------------------|-----------------------------------------------------------------------------------------------------|--------------------------------------------------------------------------------------------------------------|-----------------------------------------------------------------------------------------------------|--------------------------------------------------------------------------------------------|----------------------------------------------------------------------------------------|------------|-------------------------------------------------------|
| -1,010786787<br>1,080355846<br>-1,081232612<br>-1,00018044<br>1,030315183                                 | 0,881915709<br>0,086635933<br>0,452564341<br>0,99825333<br>0,926766786                              | -1,162072452<br><b>-4,389593654</b><br>-1,027133284<br><b>-3,65622502</b><br>-1,399324696                    | 0,503801962<br><b>3,1288E-05</b><br>0,93975676<br><b>0,000497671</b><br>0,56795582                  | -1,149671193<br><b>-4,742323166</b><br>1,052670212<br><b>-3,655565411</b><br>-1,44174548   | 0,529215673<br><b>2,77712E-05</b><br>0,880377497<br><b>0,000491405</b><br>0,532522535  |            | protein                                               |
| 2,697318352<br>-1,132413159<br>2,618388444<br>1,908890543<br>1,925533798<br>1,544647824                   | 0,01311332<br>0,248880091<br>0,003226106<br>0,049214466<br>0,118589244<br>0,155376412               | <b>3,084617243</b><br>-1,03328275<br>2,388934563<br>1,771142564<br>1,833120329<br>1,390495523                | 0,00940663<br>0,340664789<br>0,005404877<br>0,115248397<br>0,196016696<br>0,200904871               | 1,143586644<br>1,095937349<br>-1,096048625<br>-1,077773512<br>-1,050413204<br>-1,110861415 | 0,418050577<br>0,393421968<br>0,647810116<br>0,843125398<br>0,911590478<br>0,58515157  | LGG_01436* | Phosphoribosyl-ATP<br>pyrophosphatase                 |
| <b>3,021175534</b><br><b>3,081353962</b><br>2,96985535<br>1,349853571<br>1,455714738                      | 0,022756009<br>0,040214565<br>0,011578311<br>0,293420905<br>0,049665203                             | <b>3,477754998</b><br><b>4,504362548</b><br><b>3,35396382</b><br>1,313876418<br>1,361906546                  | 0,017537965<br>0,023335072<br>0,009014873<br>0,27484732<br>0,073647472                              | 1,151126427<br>1,461812763<br>1,12933575<br>-1,027382448<br>-1,068880051                   | 0,517065603<br>0,143824809<br>0,546198754<br>0,90117453<br>0,6229206                   | LGG_01443* | Histidinol dehydrogenase                              |
| 2,993164502<br><b>3,003355391</b><br><b>3,207148048</b><br>1,74815267                                     | 0,174889103<br><b>0,005599601</b><br>0,069928142<br>0,009317087                                     | 4,414862711<br><b>4,279925982</b><br><b>5,362088123</b><br>1,931701547                                       | 0,117217948<br><b>0,002564343</b><br>0,038419978<br>0,014512359                                     | 1,474981648<br>1,425048129<br>1,671917867<br>1,104995908                                   | 0,304596546<br>0,13233526<br>0,126865575<br>0,670381842                                | LGG_01444* | ATP<br>phosphoribosyltransferase<br>catalytic subunit |
| 2,754352747<br>1,644854409<br><b>3,311039168</b><br>-1,052610961<br><b>3,146965067</b><br>1,234379803     | 0,027084486<br>0,037527026<br>0,008512674<br>0,925258359<br>0,023891656<br>0,446213207              | <b>4,34144726</b><br>-1,247653638<br><b>4,937636288</b><br>1,309554611<br><b>4,554285275</b><br>-3,067243401 | 0,012552324<br>0,695073227<br><b>0,004076865</b><br>0,561450052<br>0,012587814<br>0,2953112         | 1,576213237<br>-2,052208588<br>1,491264838<br>1,378451537<br>1,447199183<br>-3,786143305   | 0,092552649<br>0,321000224<br>0,082105458<br>0,513479721<br>0,204019471<br>0,256422954 | LGG_01445* | ATP<br>phosphoribosyltransferase<br>catalytic subunit |
| <b>3,082330386</b><br>2,521812276<br><b>3,843246457</b><br>2,6226731<br><b>3,176853674</b><br>3,280996185 | 0,057133519<br>0,013035841<br><b>0,00034997</b><br>0,059611234<br><b>2,88246E-05</b><br>0,098198077 | <b>4,985480773</b><br>2,610541418<br><b>4,02937715</b><br>2,324475117<br><b>3,196854497</b><br>3,128073275   | 0,027208092<br>0,033600012<br><b>0,00032422</b><br>0,077863416<br><b>7,52717E-05</b><br>0,104478386 | 1,617438804<br>1,035184674<br>1,04843059<br>-1,128286159<br>1,006295796<br>-1,048887253    | 0,279341027<br>0,933264132<br>0,8311056<br>0,571061639<br>0,968189609<br>0,879100047   | LGG_01446* | Histidinol-phosphate<br>aminotransferase              |
| -1,010519757<br>-1,048537733<br>-1,011304138                                                              | 0,983457659<br>0,81084965<br>0,939697245                                                            | <b>6,278570944</b><br>2,559486129<br><b>4,017239436</b>                                                      | 0,059967109<br>0,005324847<br><b>0,000300331</b>                                                    | 6,344619981<br>2,683717782<br><b>4,062650866</b>                                           | 0,04199355<br>0,004927546<br><b>0,000451339</b>                                        | LGG_01501* | tRNA and rRNA cytosine-<br>C5-methylases              |

|                     |                    |                     |                    |                     |                    |            |                                 |
|---------------------|--------------------|---------------------|--------------------|---------------------|--------------------|------------|---------------------------------|
| 1,007006388         | 0,972395924        | -1,084138986        | 0,731775044        | -1,091734884        | 0,705566061        |            |                                 |
| 1,048791832         | 0,720319657        | <b>3,697207959</b>  | <b>0,000556798</b> | <b>3,525206668</b>  | <b>6,60923E-05</b> |            |                                 |
| 1,012238715         | 0,969933676        | 1,152141944         | 0,624400591        | 1,138211696         | 0,634812572        |            |                                 |
| -1,083206879        | 0,410771405        | <b>3,715386533</b>  | <b>0,000124546</b> | <b>4,024532252</b>  | <b>1,02922E-05</b> | LGG_01502* | Conserved membrane protein      |
| -1,115677021        | 0,665994295        | <b>15,3270839</b>   | <b>0,00065531</b>  | <b>17,1000753</b>   | <b>0,002910899</b> |            |                                 |
| 1,016527831         | 0,909501052        | <b>3,528345791</b>  | <b>0,000704689</b> | <b>3,470978051</b>  | <b>0,000457503</b> |            |                                 |
| -1,192665751        | 0,304660373        | 2,092600326         | <b>0,000475591</b> | 2,495772739         | 0,007107846        |            |                                 |
| 1,013261413         | 0,840822942        | <b>3,457452196</b>  | <b>1,53946E-05</b> | <b>3,412201581</b>  | <b>3,5102E-05</b>  |            |                                 |
| -1,03068072         | 0,944834966        | 1,994145308         | 0,161684829        | 2,055327122         | 0,126362938        |            |                                 |
| -1,01862374         | 0,855337511        | -1,039357113        | 0,713687374        | -1,020354299        | 0,856486059        | LGG_01503* | Conserved protein               |
| -1,157991087        | 0,302493532        | -1,380701556        | 0,034460838        | -1,192324856        | 0,17894424         |            |                                 |
| -1,007939898        | 0,869874965        | 1,23334967          | 0,019943139        | 1,243142341         | 0,0161553          |            |                                 |
| -1,00508806         | 0,979560299        | <b>-4,439615325</b> | <b>0,000116874</b> | <b>-4,417140649</b> | <b>0,000113195</b> |            |                                 |
| 1,013521548         | 0,931550385        | -1,097826528        | 0,481895101        | -1,112670842        | 0,380645197        |            |                                 |
| -1,02423886         | 0,910937025        | -1,20390548         | 0,227339324        | -1,175414766        | 0,279841085        |            |                                 |
| -1,22074681         | 0,639030474        | <b>-3,215787214</b> | 0,031410877        | -2,634278613        | 0,04718469         | LGG_01584  | Transposase, IS4 family protein |
| -1,074514563        | 0,469489231        | 1,047072567         | 0,899625355        | 1,125094722         | 0,739002112        |            |                                 |
| 1,07172963          | 0,146073825        | <b>-4,375614271</b> | <b>5,87923E-06</b> | <b>-4,689475463</b> | <b>5,12654E-06</b> |            |                                 |
| -1,010001088        | 0,975665123        | -1,446661112        | 0,54346983         | -1,432336192        | 0,546772518        |            |                                 |
| -1,041763005        | 0,676913954        | <b>-3,591177789</b> | <b>0,000345367</b> | <b>-3,447211864</b> | <b>0,000396443</b> |            |                                 |
| <b>-3,769963024</b> | <b>0,000743643</b> | <b>-4,262903842</b> | <b>0,00014831</b>  | -1,130754815        | 0,387472306        |            |                                 |
| -1,711248706        | 0,186627567        | <b>-3,2247528</b>   | 0,12538614         | -1,884444259        | 0,253231792        | LGG_01962  | Transposase                     |
| 1,139370067         | 0,481514895        | -1,089866002        | 0,623661785        | -1,241760701        | 0,198156037        |            |                                 |
| -2,243533991        | 0,007984363        | <b>-3,203572563</b> | 0,034512663        | -1,42791354         | 0,277323617        |            |                                 |
| 1,143142063         | 0,50703659         | -1,311712965        | 0,329245784        | -1,499474265        | 0,154588157        |            |                                 |
| 1,172806112         | 0,474366414        | -1,19378986         | 0,490319229        | -1,400084044        | 0,205267811        |            |                                 |

<sup>1</sup>The loci presenting a fold change in transcription level of  $\geq 3$  ( $p \leq 0.05$ ) between pair of strains using at least one probe are indicated in bold.

<sup>2</sup>The expression levels between pair of strains were compared using two-tailed Student's t-test.

<sup>3</sup>The expression of loci marked with (\*) was further analysed by real-time PCR.
